# Supplementary material for: Spatiotemporal Patterns and Quantitative Analysis of Factors Influencing Surface Ozone over East China
Source: MDPI journal article supplement (doi:10.3390/su16010123), 2023-12-22
Supplement: s1 [file s1]

# Spatiotemporal Patterns and Quantitative Analysis of Factors Influencing Surface Ozone over East China

Mingliang Ma <sup>1,\*</sup>, Mengjiao Liu <sup>1</sup>, Mengnan Liu <sup>1</sup>, Huaqiao Xing <sup>1,2</sup>, Yuqiang Wang <sup>3</sup> and Fei Meng <sup>1,\*</sup>

<sup>1</sup> School of Surveying and Geo-Informatics, Shandong Jianzhu University, Jinan 250101, China; 2023165107@stu.sdjzu.edu.cn (M.L.); 2022165123@stu.sdjzu.edu.cn (M.L.); xinghuaqiao18@sdjzu.edu.cn (H.X.)

<sup>2</sup> The Key Laboratory of Digital Simulation in Spatial Design of Architecture and Urban-Rural, Shandong Provincial Education Department, Jinan 250101, China

<sup>3</sup> Disaster Reduction Center of Shandong Province, Jinan 250102, China

\* Correspondence: mamingliang19@sdjzu.edu.cn (M.M.); lzhmf@sdjzu.edu.cn (F.M.)

Tables: 1

Figures: 1

**Table S1.** A brief summary of datasets used in this study.

| Data set name                 | abbreviation            | Type                                         | Unit                 | Spatial resolution | Temporal resolution | Source      |
|-------------------------------|-------------------------|----------------------------------------------|----------------------|--------------------|---------------------|-------------|
| Surface ozone                 | O <sub>3</sub> -surface | Surface                                      | μg/m <sup>3</sup>    | /                  | hourly              | CNEMC       |
| NO <sub>2</sub>               | CAMS-NO <sub>2</sub>    | mass fraction in air                         | kg/kg                | 0.75°×0.75°        | 3-hour              | CAMS        |
| NO <sub>2</sub>               | NO <sub>2</sub> -S5P    | tropospheric column density                  | mol/m <sup>2</sup>   | 7km×3.5km          | daily               | S5P-TROPOMI |
| HCHO                          | HCHO-CAMS               | total column density                         | kg/m <sup>2</sup>    | 0.75°×0.75°        | 3-hour              | CAMS        |
| HCHO                          | HCHO-S5P                | tropospheric column density                  | mol/m <sup>2</sup>   | 7km×3.5km          | daily               | S5P-TROPOMI |
| O <sub>3</sub>                | O <sub>3</sub> -CAMS    | mass fraction in air                         | kg/kg                | 0.75°×0.75°        | 3-hour              | CAMS        |
| C <sub>3</sub> H <sub>8</sub> | VOCS                    | total column density                         | kg/m <sup>2</sup>    | 0.75°×0.75°        | 3-hour              | CAMS        |
| C <sub>5</sub> H <sub>8</sub> |                         | total column density                         | kg/m <sup>2</sup>    | 0.75°×0.75°        | 3-hour              | CAMS        |
| CH <sub>4</sub>               |                         | total column density                         | kg/m <sup>2</sup>    | 0.75°×0.75°        | 3-hour              | CAMS        |
| H <sub>2</sub> O <sub>2</sub> |                         | total column density                         | kg/m <sup>2</sup>    | 0.75°×0.75°        | 3-hour              | CAMS        |
| OH                            |                         | total column density                         | kg/m <sup>2</sup>    | 0.75°×0.75°        | 3-hour              | CAMS        |
| PAN                           |                         | total column density                         | kg/m <sup>2</sup>    | 0.75°×0.75°        | 3-hour              | CAMS        |
| NO <sub>x</sub>               | NO <sub>x</sub> -CAMS   | emissions of NO <sub>x</sub> for sum sectors | kg/m <sup>2</sup> /s | 0.1°×0.1°          | monthly             | CAMS        |
| Surface temperature           | T                       | Surface 2m                                   | K                    | 0.1°×0.1°          | 1-hour              | ERA5        |
| Surface UV radiation          | UV                      | Integrated                                   | J/m <sup>2</sup>     | 0.1°×0.1°          | 1-hour              | ERA5        |
| Relative humidity             | RH                      | 1000 hpa                                     | %                    | 0.1°×0.1°          | 1-hour              | ERA5        |

|                       |      |             |     |             |        |        |
|-----------------------|------|-------------|-----|-------------|--------|--------|
| Surface pressure      | SP   | Surface     | Pa  | 0.1°×0.1°   | 1-hour | ERA5   |
| Boundary layer height | BLH  | Integrated  | m   | 0.1°×0.1°   | 1-hour | ERA5   |
| Wind speed            | WS   | Surface 10m | m/s | 0.1°×0.1°   | 1-hour | ERA5   |
| Wind direction        | WD   | Surface 10m | °   | 0.1°×0.1°   | 1-hour | ERA5   |
| Total cloud cover     | TCC  | Integrated  | %   | 0.1°×0.1°   | 1-hour | ERA5   |
| Total precipitation   | TP   | Integrated  | m   | 0.1°×0.1°   | 1-hour | ERA5   |
| DEM                   | DEM  | /           | m   | 30m×30m     | /      | CRESDC |
| Population            | POPU | /           | /   | 1km×1km     | 1-year | CRESDC |
| LULC                  | LULC | /           | /   | 30m×30m     | 1-year | CRESDC |
| NDVI                  | NDVI | Surface     | /   | 0.05°×0.05° | 16-day | MODIS  |

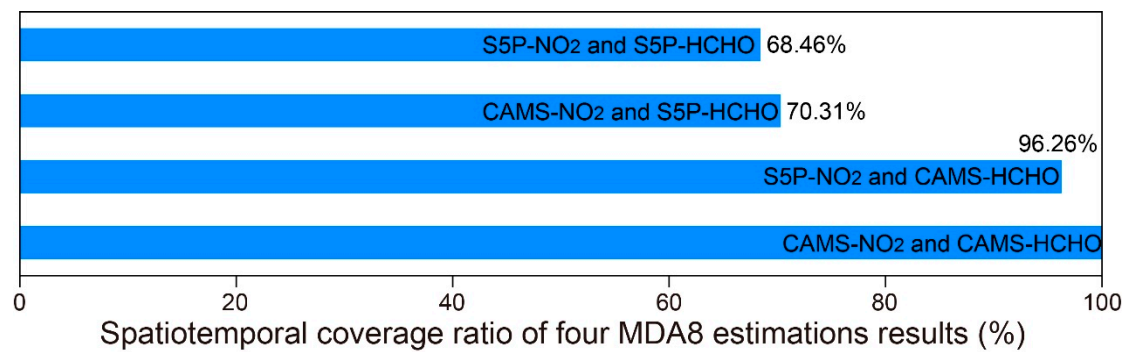

**Figure S1.** Spatiotemporal coverage ratio of four surface ozone estimation models.
